# Supplementary material for: Computational screening of high activity and selectivity of CO2 reduction via transition metal single-atom catalysts on triazine-based graphite carbon nitride
Source: Royal Society of Chemistry journal article supplement (doi:10.1039/d3cp03051b), 2023-01-01
Supplement: d3cp03051b1.pdf [file d3cp03051b1.pdf]

## Supporting Information

# Computational Screening of High Activity and Selectivity of CO<sub>2</sub> Reduction via Transition Metal Single-Atom Catalysts on Triazine-based Graphite Carbon Nitride

Shuang Ji,<sup>a</sup> Yi Li,<sup>\*ab</sup> Yongfan Zhang<sup>ab</sup> and Wei Lin <sup>\*ab</sup>

<sup>a</sup> State Key Laboratory of Photocatalysis on Energy and Environment, College of Chemistry, Fuzhou University, Fuzhou 350108, P.R. China

<sup>b</sup> Fujian Provincial Key Laboratory of Theoretical and Computational Chemistry, Xiamen University, Xiamen, Fujian 361005, China;

\* To whom correspondence should be addressed. Email: liy99@fzu.edu.cn; wlin@fzu.edu.cn

**Table S1.** Calculated thermodynamic quantities of gas-phase molecules, including energy, zero-point energy correction, enthalpic temperature correction, and entropy contribution, respectively.

| Species            | E / (eV) | ZPE / (eV) | $\int C_p dT /$ (eV) | TS / (eV) |
|--------------------|----------|------------|----------------------|-----------|
| CO <sub>2</sub>    | -23.07   | 0.30       | 0.10                 | 0.66      |
| CO                 | -14.78   | 0.13       | 0.09                 | 0.69      |
| H <sub>2</sub>     | -6.76    | 0.27       | 0.09                 | 0.43      |
| HCOOH              | -30.24   | 0.89       | 0.11                 | 0.84      |
| CH <sub>3</sub> OH | -30.43   | 1.36       | 0.11                 | 0.78      |
| H <sub>2</sub> O   | -14.54   | 0.56       | 0.10                 | 0.67      |
| CH <sub>4</sub>    | -24.02   | 1.19       | 0.10                 | 0.58      |

**Table S2.** Formation energy ( $E_f$ ) and dissolution potential ( $U_{diss}$ ) of metals, number of transferred electrons ( $N_e$ ) during the dissolution and distance of transition metal and nitrogen atoms ( $d_{TM-N}$ ). For comparison, standard dissolution potential ( $U_{diss}^\circ$ ) of metal atoms are also listed. Charge Transfer ( $Q_{TM}$ ) on TM@TGCN systems.

| <b>Metal</b> | $E_f$ (eV) | $U_{diss}^\circ$ (V) | $N_e$ | $U_{diss}$ (V) | $d_{TM-N}$ (Å) | $Q_{TM}$ (e) |
|--------------|------------|----------------------|-------|----------------|----------------|--------------|
| Sc           | -6.17      | -2.08                | 3     | -0.02          | 2.05/2.09      | -1.90        |
| Ti           | -5.59      | -1.63                | 2     | 1.16           | 1.96           | -1.77        |
| V            | -4.8       | -1.18                | 2     | 1.22           | 1.94           | -1.57        |
| Cr           | -2.53      | -0.91                | 2     | 0.36           | 1.92/2.05      | -1.38        |
| Mn           | -2.76      | -1.19                | 2     | 0.19           | 2.01           | -1.39        |
| Fe           | -3.15      | -0.45                | 2     | 1.13           | 1.89           | -1.08        |
| Co           | -3.32      | -0.28                | 2     | 1.38           | 1.88           | -0.93        |
| Ni           | -2.62      | -0.26                | 2     | 1.05           | 1.96           | -0.70        |
| Cu           | -1.86      | 0.34                 | 2     | 1.27           | 1.89           | -0.68        |
| Zn           | -0.38      | -0.76                | 2     | -0.57          | 2.62           | -0.04        |
| Y            | -2.5       | -2.37                | 3     | -1.54          | 2.3            | -2.52        |
| Zr           | -7.33      | -1.45                | 4     | 0.38           | 2.09           | -2.74        |
| Nb           | -6.72      | -1.10                | 3     | 1.14           | 2.02           | -2.11        |
| Mo           | -4.67      | -0.2                 | 3     | 1.36           | 1.96           | -1.53        |
| Ru           | -3.21      | 0.46                 | 2     | 2.06           | 1.93           | -1.04        |
| Rh           | -2.71      | 0.60                 | 2     | 1.95           | 2.07           | -0.62        |
| Pd           | -1.43      | 0.95                 | 2     | 1.66           | 2.27           | -0.33        |
| Ag           | -0.64      | 0.95                 | 1     | 1.44           | 2.48/2.54      | -0.13        |
| Hf           | -6.76      | -1.55                | 4     | 0.14           | 2.03           | -2.43        |
| Ta           | -6.06      | -0.6                 | 3     | 1.42           | 1.99           | -2.14        |
| W            | -4.81      | 0.1                  | 3     | 1.7            | 1.94           | -1.77        |
| Re           | -4.77      | 0.3                  | 3     | 1.89           | 1.94           | -1.40        |
| Os           | -4.52      | 0.84                 | 8     | 1.41           | 1.93/1.97      | -0.89        |
| Ir           | -2.51      | 1.16                 | 3     | 2              | 2.1            | -0.08        |
| Pt           | -2.5       | 1.18                 | 2     | 2.43           | 1.9/3.0        | -0.05        |

|    |       |      |   |      |         |       |
|----|-------|------|---|------|---------|-------|
| Au | -0.88 | 1.50 | 3 | 1.79 | 2.2/3.3 | -0.03 |
|----|-------|------|---|------|---------|-------|

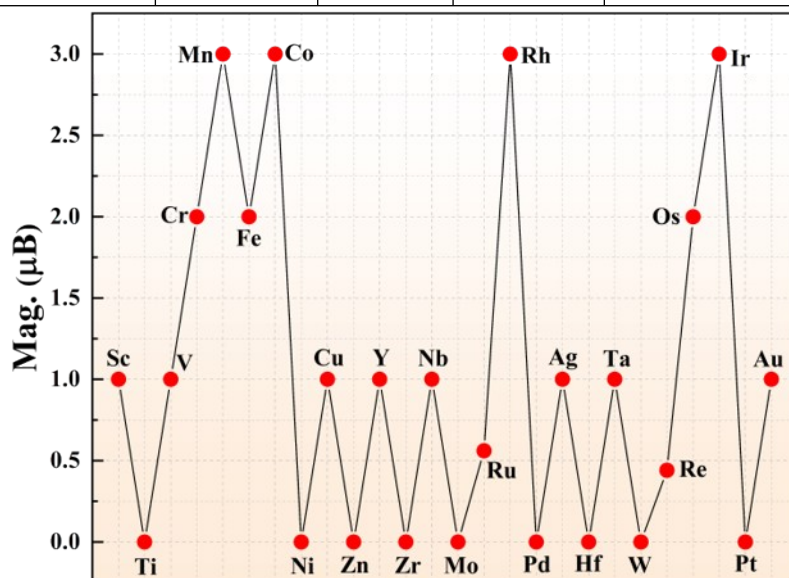

**Figure S1.** Total magnetic moments of TM@TGCN systems.

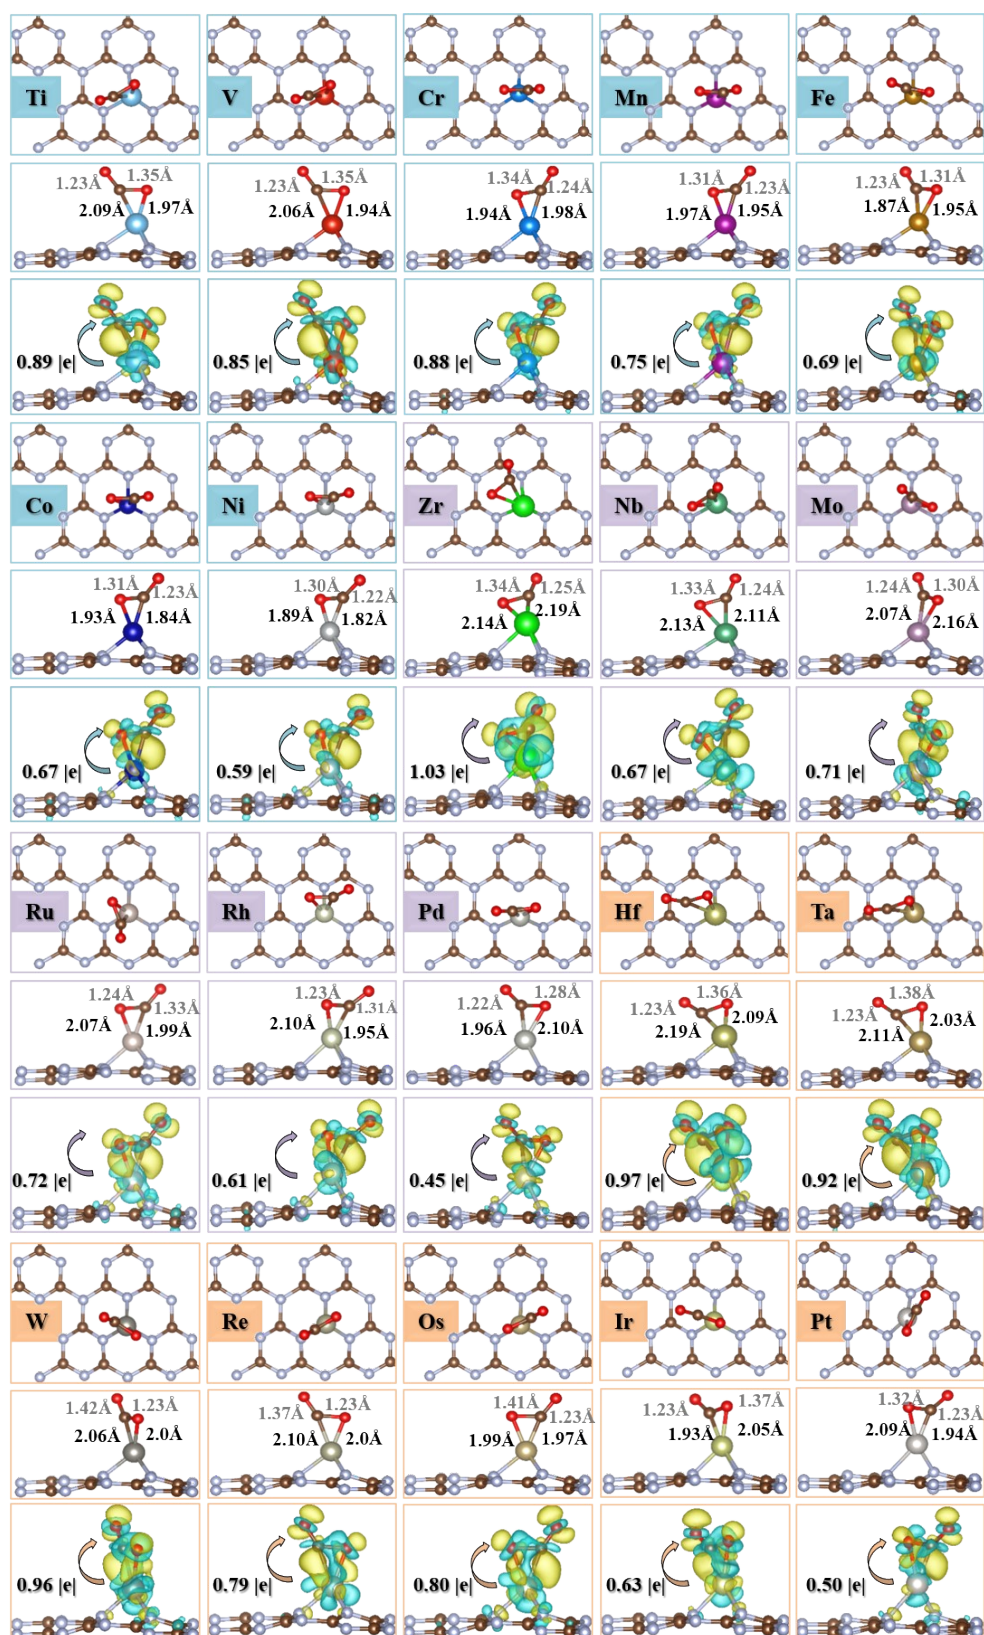

**Figure S2.** The most stable adsorption configuration and charge density differences of CO<sub>2</sub> adsorbed on TM@TGCN isosurface level is set to 0.005 e Å<sup>-3</sup>. Cyan and yellow area represent charge depletion and accumulation, respectively.

**Table S3.** The calculated Gibbs free energy changes ( $\Delta G$ , eV) of the reaction intermediates in the CO<sub>2</sub>RR and HER on the TM@TGCN monolayers.

| TM@TGCN   | $\Delta G[*_{CO_2}]$ | $\Delta G[*_{OCHO}]$ | $\Delta G[*_{COOH}]$ | $\Delta G[*_H]$ | $\Delta G[*_{OH}]$ | $\Delta G[*_{H_2O}]$ |
|-----------|----------------------|----------------------|----------------------|-----------------|--------------------|----------------------|
| <b>Ti</b> | <b>-0.23</b>         | <b>-0.59</b>         | <b>0.36</b>          | <b>0.55</b>     | <b>-0.55</b>       | <b>0.21</b>          |
| <b>V</b>  | <b>-0.04</b>         | <b>-0.65</b>         | <b>0.30</b>          | <b>0.42</b>     | <b>-0.59</b>       | <b>0.09</b>          |
| <b>Cr</b> | <b>-0.66</b>         | <b>-0.80</b>         | <b>-0.20</b>         | <b>0.14</b>     | <b>-0.96</b>       | <b>0.01</b>          |
| <b>Mn</b> | <b>-0.40</b>         | <b>-0.52</b>         | <b>0.21</b>          | <b>-0.18</b>    | <b>-0.07</b>       | <b>0.72</b>          |
| <b>Fe</b> | <b>-0.64</b>         | <b>-0.89</b>         | <b>-0.22</b>         | <b>-0.32</b>    | <b>-0.20</b>       | <b>-0.18</b>         |
| <b>Co</b> | <b>-0.92</b>         | <b>-0.98</b>         | <b>-0.20</b>         | <b>-0.50</b>    | <b>-0.59</b>       | <b>-0.20</b>         |
| <b>Ni</b> | <b>-1.86</b>         | <b>-1.28</b>         | <b>-0.89</b>         | <b>-1.10</b>    | <b>-1.24</b>       | <b>-0.84</b>         |
| <b>Cu</b> | <b>0.03</b>          | —                    | —                    | —               | —                  | —                    |
| <b>Zr</b> | <b>-0.88</b>         | <b>-0.66</b>         | <b>0.31</b>          | <b>0.19</b>     | <b>-1.00</b>       | <b>0.45</b>          |
| <b>Nb</b> | <b>-0.21</b>         | <b>-0.56</b>         | <b>0.40</b>          | <b>0.41</b>     | <b>-0.53</b>       | <b>0.45</b>          |
| <b>Mo</b> | <b>-0.55</b>         | <b>-0.79</b>         | <b>-0.24</b>         | <b>-0.03</b>    | <b>-0.82</b>       | <b>-0.04</b>         |
| <b>Ru</b> | <b>-1.46</b>         | <b>-1.72</b>         | <b>-0.91</b>         | <b>-0.92</b>    | <b>-0.96</b>       | <b>-0.05</b>         |
| <b>Rh</b> | <b>-1.34</b>         | <b>-0.86</b>         | <b>-1.22</b>         | <b>-0.68</b>    | <b>-0.64</b>       | <b>-0.26</b>         |
| <b>Pd</b> | <b>-1.01</b>         | <b>-0.14</b>         | <b>-0.30</b>         | <b>-0.52</b>    | —                  | —                    |
| <b>Ag</b> | <b>0.12</b>          | —                    | —                    | —               | —                  | —                    |
| <b>Hf</b> | <b>-0.94</b>         | <b>-1.12</b>         | <b>0.04</b>          | <b>0.05</b>     | <b>-1.21</b>       | <b>0.20</b>          |
| <b>Ta</b> | <b>-1.14</b>         | <b>-1.01</b>         | <b>-0.4</b>          | <b>-0.19</b>    | <b>-1.15</b>       | <b>0.11</b>          |
| <b>W</b>  | <b>-1.05</b>         | <b>-1.19</b>         | <b>-0.73</b>         | <b>-0.53</b>    | <b>-1.43</b>       | <b>-0.23</b>         |
| <b>Re</b> | <b>-1.15</b>         | <b>-1.21</b>         | <b>-1.15</b>         | <b>-1.02</b>    | <b>-1.57</b>       | <b>-0.37</b>         |
| <b>Os</b> | <b>-2.15</b>         | <b>-1.13</b>         | <b>-1.49</b>         | <b>-1.37</b>    | <b>-1.60</b>       | <b>0.37</b>          |
| <b>Ir</b> | <b>-2.02</b>         | <b>-1.45</b>         | <b>-2.00</b>         | <b>-1.23</b>    | <b>-1.07</b>       | <b>-0.80</b>         |
| <b>Pt</b> | <b>-1.53</b>         | <b>-0.20</b>         | <b>-0.75</b>         | <b>-1.07</b>    | —                  | —                    |
| <b>Au</b> | <b>0.17</b>          | —                    | —                    | —               | —                  | —                    |

**Scheme S1.** The possible reaction pathways for CO<sub>2</sub>RR and various products (in red) on TM@TGCN monolayers.

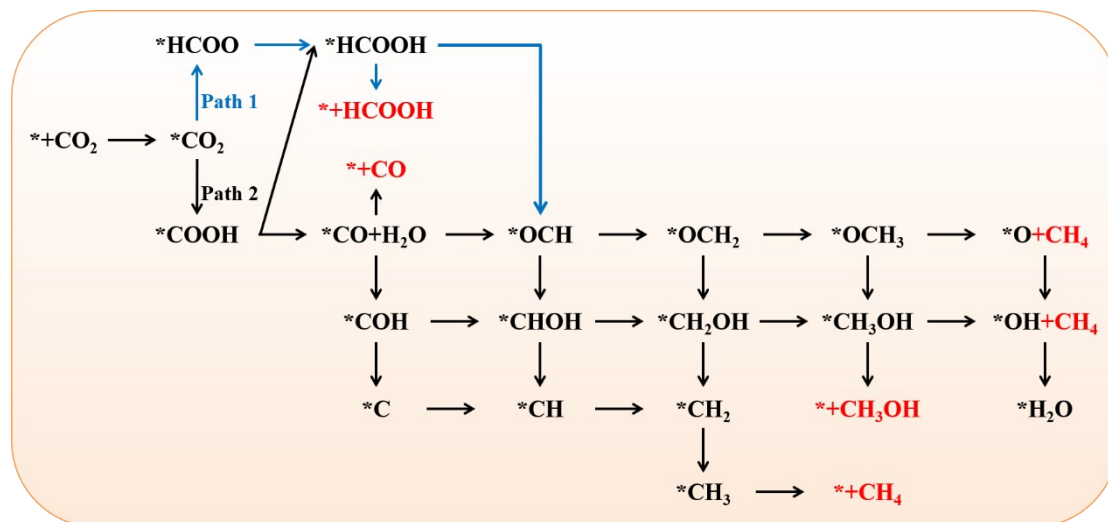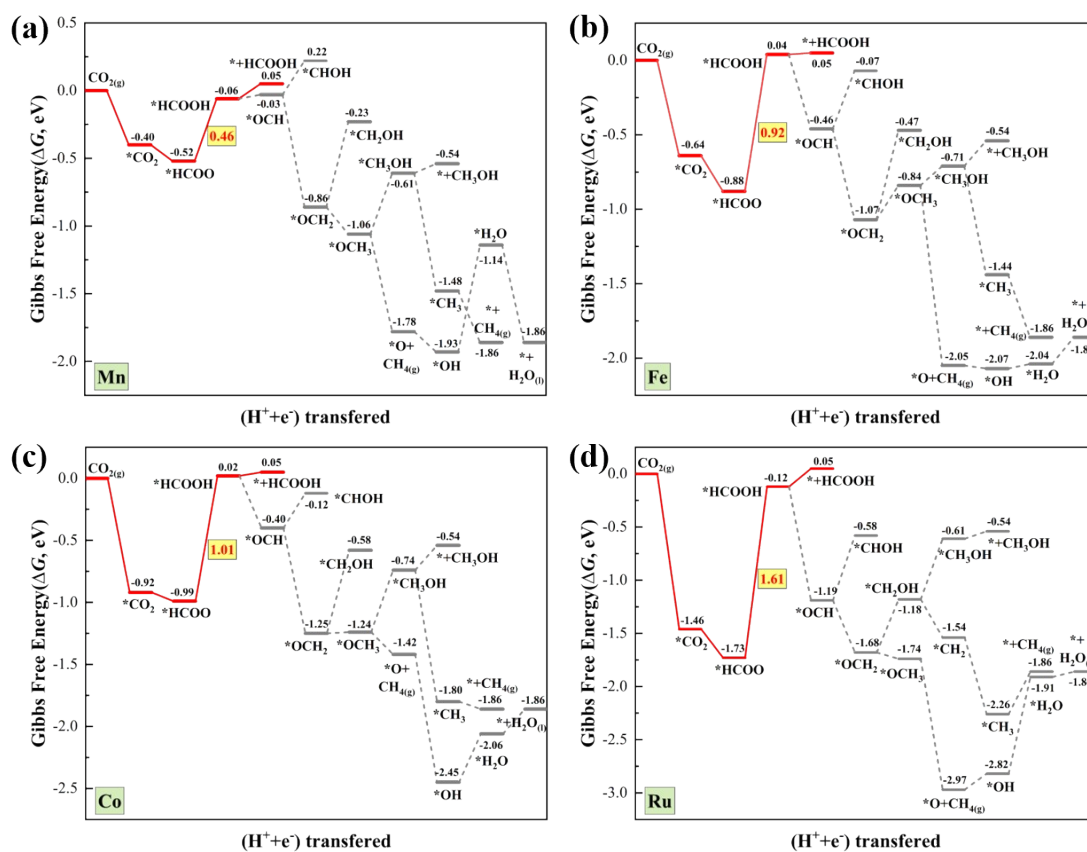

**Figure S3.** The Gibbs free energy diagrams of CO<sub>2</sub>RR to C1 products on (a) Mn@TGCN, (b) Fe@TGCN, (c) Co@TGCN and (d) Ru@TGCN at zero potential.

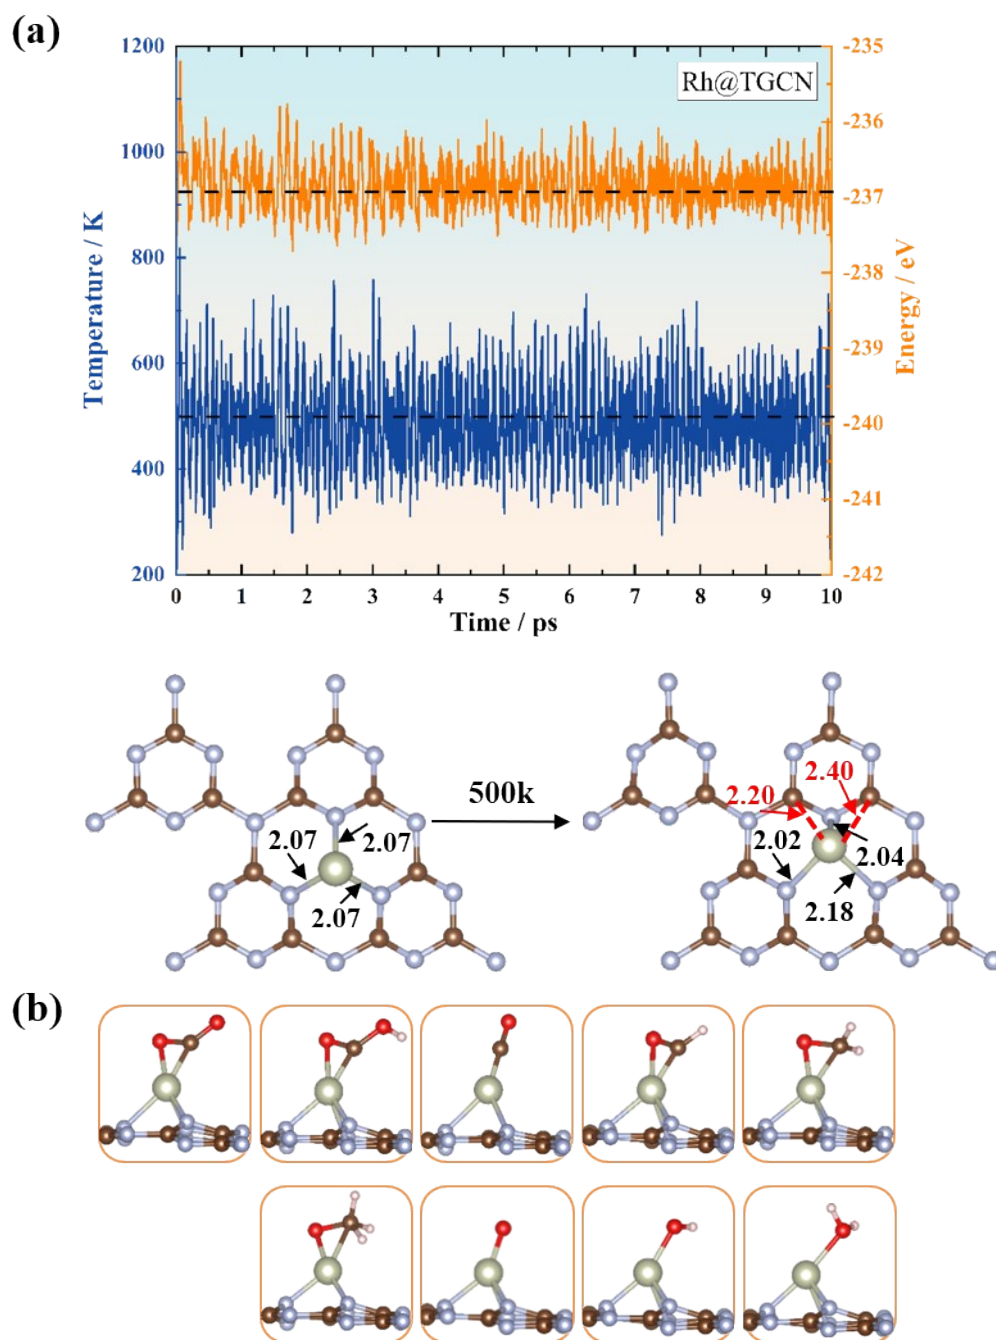

**Figure S4.** (a) The AIMD simulation of Rh@TGCN is run at 500 K for 10 ps with a time step of 1 fs. And top view of the final structures of Rh@TGCN monolayers after 10 ps AIMD simulations. (b) The most stable configuration of intermediates involved.



**Table S4.** The calculated descriptor ( $\Phi$ ) and d-band center on TM@TGCN based SACs.

| TM@TGCN | $\Phi$ | d band center |
|---------|--------|---------------|
| Ti      | 3.50   | 0.82          |
| V       | 4.77   | 0.31          |
| Cr      | 6.00   | -0.07         |
| Mn      | 6.74   | -0.35         |
| Fe      | 9.38   | -0.95         |
| Co      | 11.13  | -1.46         |
| Ni      | 12.82  | -1.02         |
| Zr      | 2.58   | 1.76          |
| Nb      | 4.04   | 1.20          |
| Mo      | 6.82   | -0.04         |
| Ru      | 9.89   | -1.48         |
| Rh      | 11.86  | -1.27         |
| Pd      | 13.02  | -1.04         |
| Hf      | 2.50   | 0.82          |
| Ta      | 3.75   | 0.02          |
| W       | 7.34   | -0.41         |
| Re      | 7.07   | -1.18         |
| Os      | 9.51   | -1.53         |
| Ir      | 11.35  | -1.48         |
| Pt      | 12.88  | -1.22         |

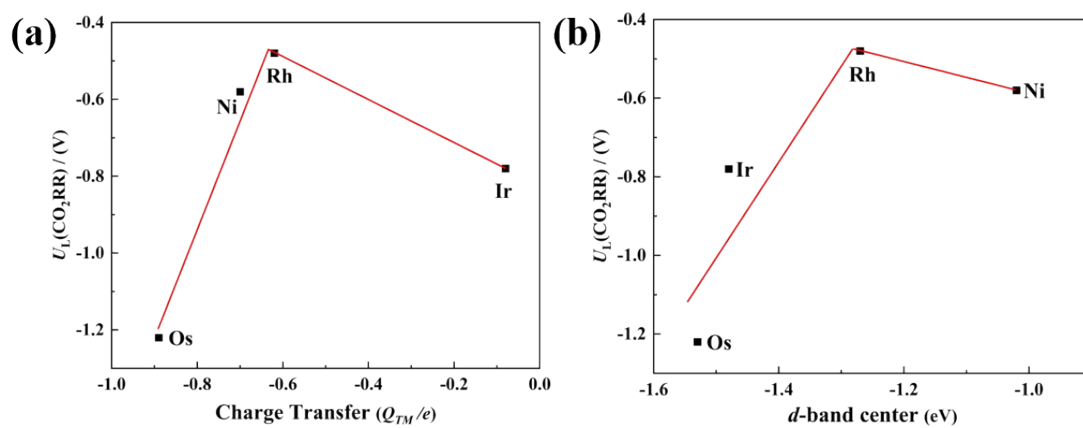

**Figure S5.** Volcano plot of the limiting potential of the most energy-favorable pathway for  $\text{CO}_2\text{RR}$  relative to (a) charge transfer and (b) the  $d$ -band center of ( $\epsilon^d$ ) TM@TGCN.
